# Psychiatric Services

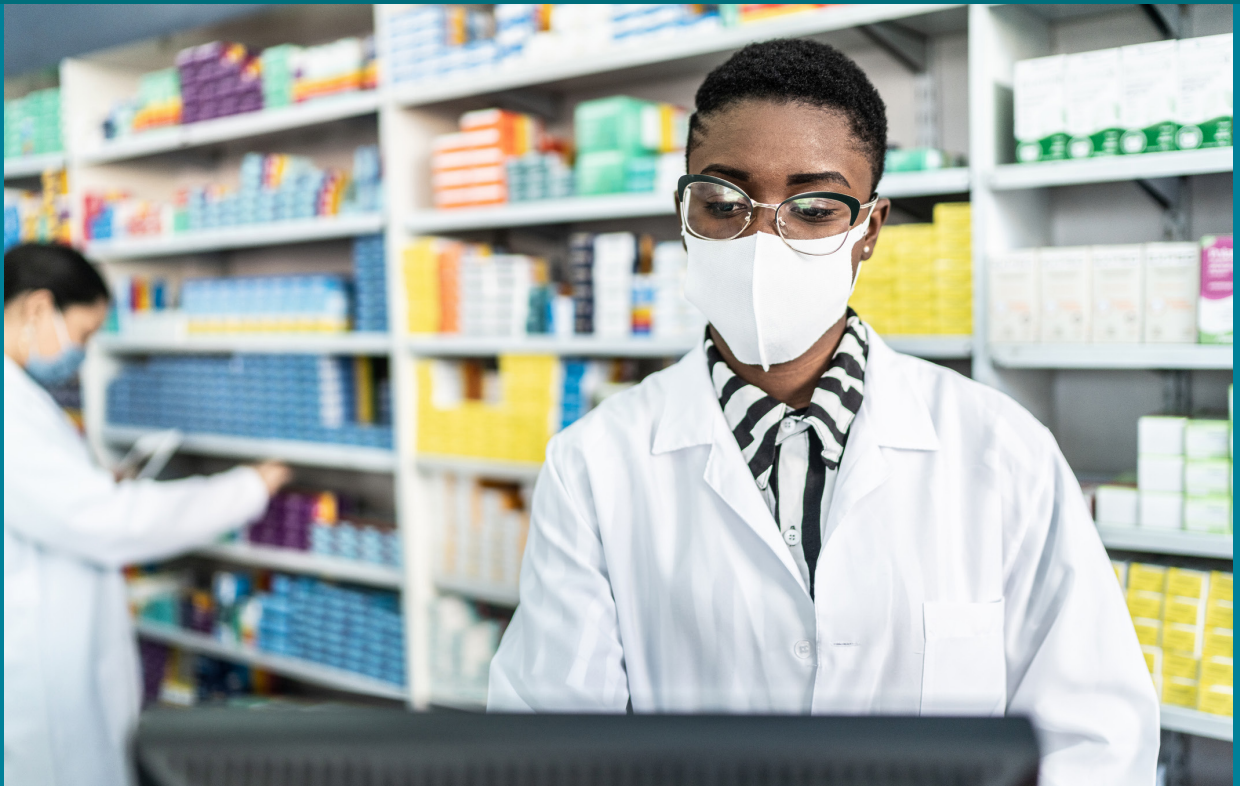

Pocketbook issues: esketamine nasal spray and pharmacy pricing of antipsychotics

Cost-effectiveness of Housing First with assertive community treatment

Disclosing lived experience in the workplace among mental health professionals

Managing COVID-19 in behavioral health systems, forensic institutions, and Massachusetts
