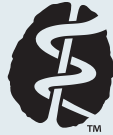

# Psychiatric Services

A Journal of the American Psychiatric Association

*Psychiatric Services*, established in 1950, is published monthly by the American Psychiatric Association for mental health professionals and others concerned with treatment and services for persons with mental illnesses and mental disabilities, in keeping with APA's objectives to improve care and treatment, to promote research and professional education in psychiatric and related fields, and to advance the standards of all psychiatric services and facilities.

## Mailing Address

*Psychiatric Services*  
American Psychiatric Association  
800 Maine Ave., S.W., Suite 900  
Washington, DC 20024  
Email: psjournal@psych.org

## American Psychiatric Association

Jeffrey Geller, M.D., M.P.H.

*President*

Ivian Pender, M.D.

*President-Elect*

Saul Levin, M.D., M.P.A.

*Chief Executive Officer and Medical  
Director*

## Editor

Lisa B. Dixon, M.D., M.P.H.

## Editorial Board

Regina Bussing, M.D., M.S.H.S.

Robert J. Hilt, M.D.

Marcela Horvitz-Lennon, M.D., M.P.H.

Hunter L. McQuiston, M.D.

Jeanne Miranda, Ph.D.

Ramin Mojtabai, M.D., Ph.D.

Mark R. Munetz, M.D.

Mark Olfson, M.D., M.P.H.

David W. Oslin, M.D.

Rebecca C. Rossom, M.D., M.S.

Jason Schiffman, Ph.D.

Ruth S. Shim, M.D., M.P.H.

T. Scott Stroup, M.D., M.P.H.

Lawrence Wissow, M.D., M.P.H.

## Contributing Editors

*Case Studies in Public-Sector*

*Leadership*

Jules M. Ranz, M.D., and Stephanie  
Le Melle, M.D.

*Controversies in Psychiatric Services*

*Matthew D. Erlich, M.D., Patrick  
Runnels, M.D., M.B.A., Rachel Talley, M.D.*

*Culture & Mental Health Services*

Roberto Lewis-Fernández, M.D.

*Datapoints*

Tami L. Mark, Ph.D., and Alexander J.  
Cowell, Ph.D.

*Economic Grand Rounds*

Steven S. Sharfstein, M.D., Haiden A.  
Huskamp, Ph.D., and Alison Evans  
Cuellar, Ph.D.

*From Pages to Practice* podcast

Josh Berezin, M.D., M.S.

*Frontline Reports*

Francine Cournos, M.D., and Stephen  
M. Goldfinger, M.D.

*Global Mental Health Reforms*

Kathleen M. Pike, M.D.

*Integrated Care*

Benjamin G. Druss, M.D., M.P.H., and  
Gail L. Daumit, M.D., M.H.S.

*Law & Psychiatry*

Paul S. Appelbaum, M.D.

*Lived Experience Inclusion & Leadership*

*Nev Jones, Ph.D., Keris Jän Myrick,  
M.B.A., M.S.*

*Personal Accounts*

Patricia E. Deegan, Ph.D., and William  
C. Torrey, M.D.

*Promoting High-Value Mental Health  
Care*

Marcela Horvitz-Lennon, M.D., M.P.H.,  
and Kenneth Minkoff, M.D.

*Research, Community, & Services  
Partnerships*

Debra A. Pinals, M.D.

*Social Determinants of Mental Health*

Ruth S. Shim, M.D., M.P.H., and  
Michael T. Compton, M.D., M.P.H.

*State Mental Health Policy*

Marvin S. Swartz, M.D., and Steven  
Starks, M.D.

*Technology in Mental Health*

Dror Ben-Zeev, Ph.D.

## Early-Career Psychiatrist Advisory Committee

Lilanthi Balasuriya, M.D., M.M.S.

Hector Colon-Rivera, M.D., M.R.O.

Ayana Jordan, M.D., Ph.D.

Misty C. Richards, M.D., M.S.

Stephanie A. Rolin, M.D.

Rishi Sawhney, M.D.

*Collections Editors:* Carrie Cunningham,

M.D., M.P.H., and Matthew L. Goldman,  
M.D., M.S.

## Editors Emeriti

Howard H. Goldman, M.D., Ph.D.

John A. Talbott, M.D.

## Statistical Consultant

Melanie M. Wall, Ph.D.

## Editorial Consultants

Dixon Chibanda, M.D., M.P.H.

Shirley M. Glynn, Ph.D.

Judith Weissman, Ph.D., J.D.

## Editorial Staff

Demarie S. Jackson

*Managing Editor*

Martin J. Spiering, Ph.D., E.L.S.

*Senior Editor and Writer*

Brendan Missett

*Staff Editor*

Wendy Lieberman Taylor

*Production Manager*

Heidi A. Koch-Bubel

*Editorial Support Services Manager*

## Publisher

John McDuffie

## Editorial Director, Journals

Michael D. Roy
